# Supplementary material for: Hippocampal Resting State Functional Connectivity Associated with Physical Activity in Periadolescent Children
Source: MDPI journal article supplement (doi:10.3390/brainsci13111558), 2023-11-07
Supplement: s1 [file s1]

Supplementary Materials

**Supplementary Figure S1.** Lateral, medial, and dorsal brain views of hippocampal rs-FC

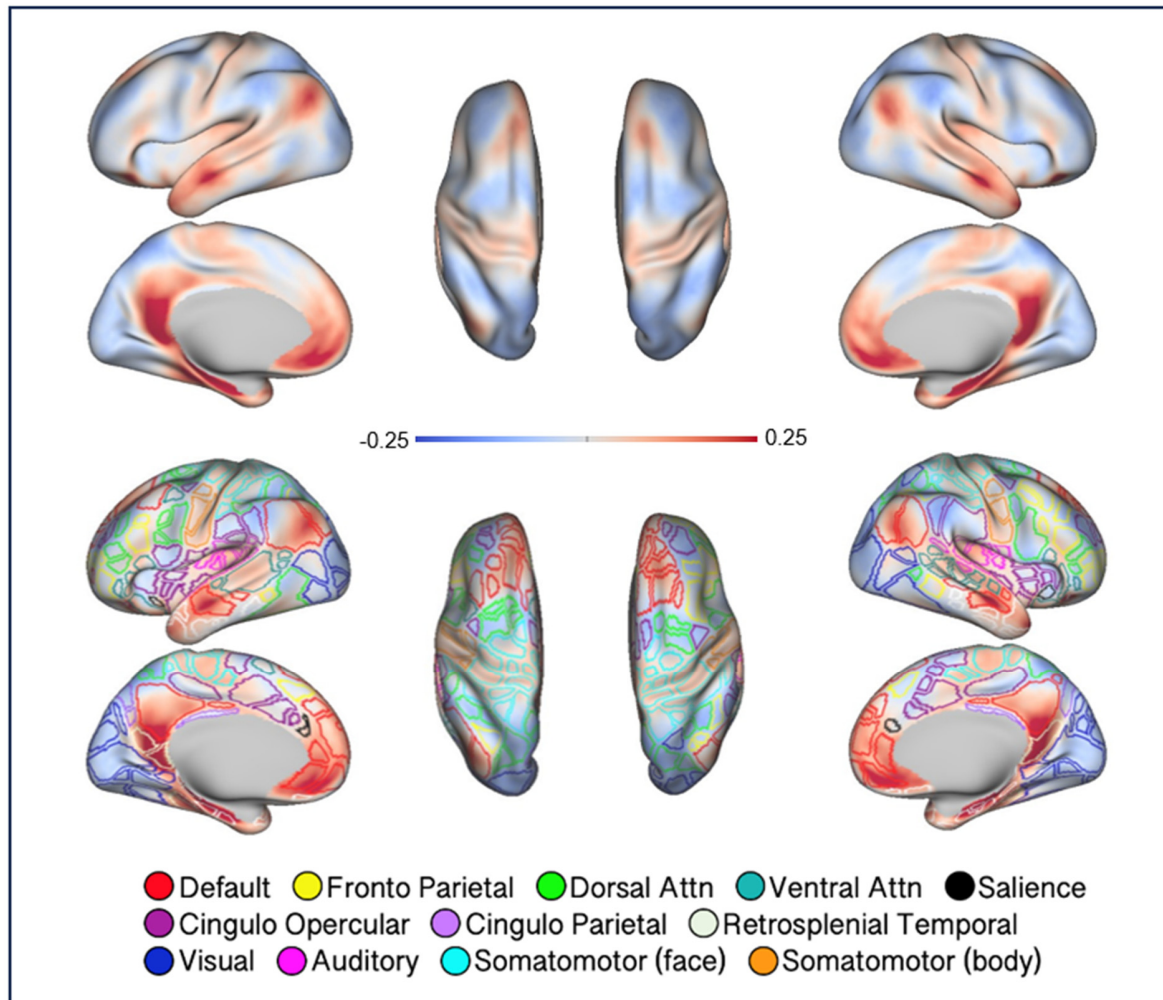

**Supplemental Figure S1.** (Top) Lateral, medial, and dorsal brain views of mean hippocampal rs-FC, and (bottom) lateral, medial, and dorsal brain views of mean hippocampal rs-FC overlaid with Gordon's 333 parcellation.

**Supplementary Figure S2.** Lateral, medial, and dorsal brain views of rs-FC covarying with physical activity

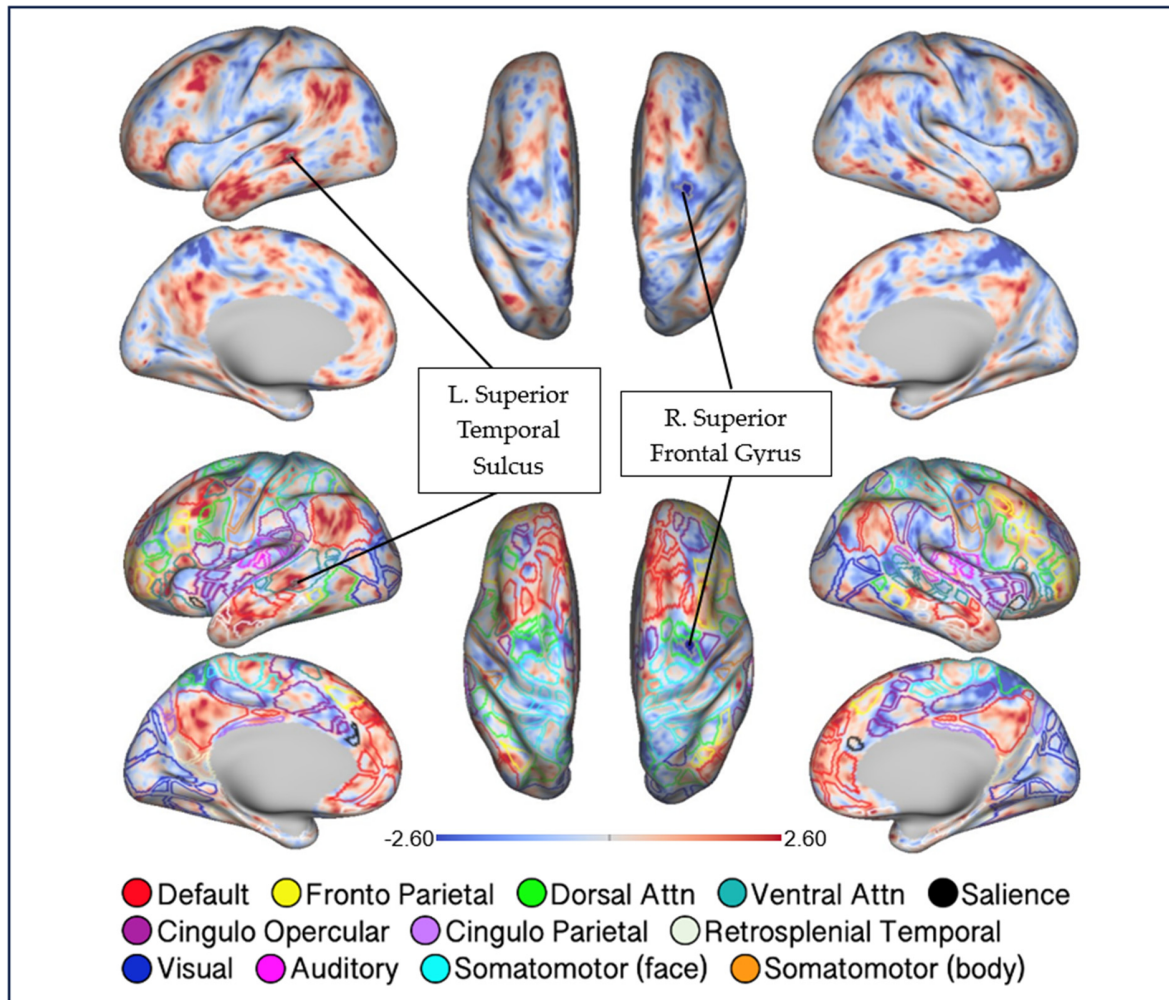

**Supplementary Figure S2.** (Top) Lateral, medial, and dorsal brain views of rs-FC covariation with self-reported physical activity, with significant clusters outlined in white, and (bottom) overlaid with Gordon's 333 parcellation.
